# Supplementary material for: A Mie resonant antenna with high sensitivity for force and strain measurement
Source: PubMed Central journal article supplement (PMC5496900; doi:10.1038/s41598-017-04911-2), 2017-07-04
Supplement: 41598_2017_4911_MOESM1_ESM.pdf [file 41598_2017_4911_MOESM1_ESM.pdf]

# Supporting information

## **A Mie resonant antenna with high sensitivity for force and strain measurement**

Lingling Wu,<sup>1</sup> Xiaoqing Xi,<sup>1</sup> Bo Li,<sup>2\*</sup> Ji Zhou<sup>1\*</sup>

<sup>1</sup>State Key Laboratory of New Ceramics and Fine Processing, School of Materials Science and Engineering, Tsinghua University, Beijing 100084, China

<sup>2</sup>Advanced Materials Institute, Shenzhen Graduate School, Tsinghua University, Shenzhen, China

---

<sup>1</sup> \*Author to whom correspondence should be addressed. Electronic mail: [zhouji@mail.tsinghua.edu.cn](mailto:zhouji@mail.tsinghua.edu.cn)

Author to whom correspondence should be addressed. Electronic mail: [boli@mail.tsinghua.edu.cn](mailto:boli@mail.tsinghua.edu.cn)

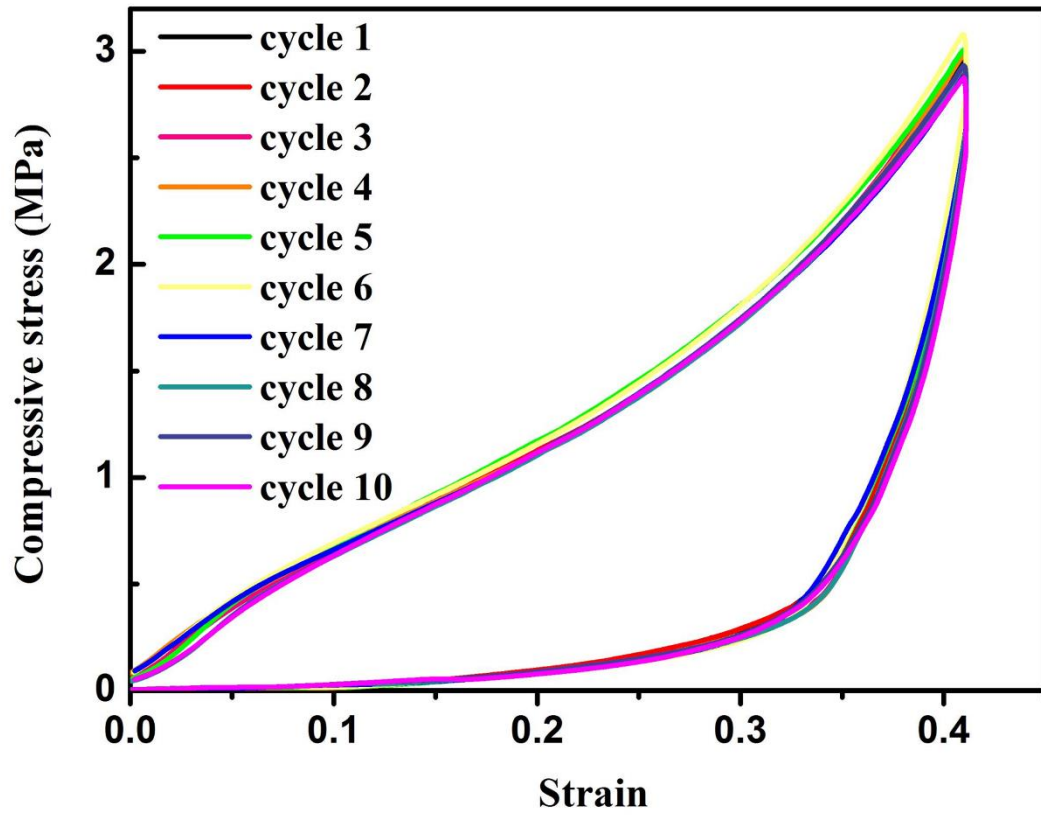

Figure S1 | 10 cycles of measured loading and unloading curves for the rubber
